# Supplementary material for: Theoretical aspects of the enhancement of metal binding affinity by intramolecular hydrogen bonding and modulating pKavalues
Source: Royal Society of Chemistry journal article supplement (doi:10.1039/c7nj02693e), 2017-01-01
Supplement: c7nj02693e1.pdf [file c7nj02693e1.pdf]

## **Electronic Supplementary Information**

### **Theoretical aspects on the enhancement of metal binding affinity by intramolecular hydrogen bonding and modulating pK<sub>a</sub> values**

Ahmad Motahari, Alireza Fattahi\*

Faculty of Chemistry, Sharif University of Technology, P. O. Box 11365-9516, Tehran, Iran

\*Corresponding author

Tel: +982166165342

E-mail: [fattahi@sharif.ir](mailto:fattahi@sharif.ir)

**Table S1.** Comparison of the calculated and experimental minimum bond lengths (in Å) available in two of the studied complexes. The calculated bond lengths are at the level of M06-2X/6-31+G\*

| compound                                       | Zn-O   | Mg-O   | C-O    |
|------------------------------------------------|--------|--------|--------|
| Zn <sup>2+</sup> complex (RELDUH) <sup>a</sup> | 2.0478 |        | 1.4138 |
| Zn <sup>2+</sup> -AL1-3an                      | 1.9460 |        | 1.3972 |
| Mg <sup>2+</sup> complex (ODAKEJ) <sup>b</sup> |        | 2.0256 | 1.4494 |
| Mg <sup>2+</sup> -AL1                          |        | 1.9617 | 1.4825 |

<sup>a</sup> CSD entry for a Zn<sup>2+</sup> complex which resembles to the studied complex Zn<sup>2+</sup>-AL1-3an. The experimental bond lengths are reported in this row.

<sup>b</sup> CSD entry for a Mg<sup>2+</sup> complex which resembles to the studied complex Mg<sup>2+</sup>-AL1. The experimental bond lengths are reported in this row.

**Table S2.** Selected bond lengths (in Å) for different studied complexes of AL3 at the level of M06-2X/6-31+G\*

| compound | Bond    | Mg <sup>2+</sup> | Ca <sup>2+</sup> | Zn <sup>2+</sup> |
|----------|---------|------------------|------------------|------------------|
| AL3      | M...O3  | 1.93             | 2.28             | 1.92             |
|          | M...O2  | 1.93             | 2.29             | 1.92             |
|          | M...O1  | 1.92             | 2.25             | 1.94             |
|          | H3...O5 | 1.60             | 1.67             | 1.58             |
|          | H2...O6 | 1.61             | 1.67             | 1.59             |
|          | H1...O4 | 1.54             | 1.61             | 1.53             |
|          | H4...O7 | 1.78             | 1.80             | 1.78             |
|          | AL3-an  | M...O3           | 1.95             | 2.30             |
| M...O2   |         | 1.95             | 2.31             | 1.96             |
| M...O1   |         | 1.84             | 2.15             | 1.85             |
| H3...O5  |         | 1.69             | 1.74             | 1.71             |
| H2...O6  |         | 1.71             | 1.74             | 1.71             |
| H4...O1  |         | 1.83             | 1.77             | 1.87             |
| H7...O4  |         | 1.98             | 1.97             | 1.99             |
| AL3-2an  |         | M...O3           | 2.00             | 2.35             |
|          | M...O2  | 1.85             | 2.16             | 1.84             |
|          | M...O1  | 1.87             | 2.18             | 1.88             |
|          | H3...O5 | 1.78             | 1.81             | 1.81             |
|          | H6...O2 | 1.84             | 1.79             | 1.87             |
|          | H4...O1 | 1.75             | 1.69             | 1.77             |
|          | H7...O4 | 1.93             | 1.91             | 1.94             |
|          | AL3-3an | M...O3           | 1.89             | 2.21             |
| M...O2   |         | 1.89             | 2.20             | 1.89             |
| M...O1   |         | 1.90             | 2.21             | 1.94             |
| H5...O3  |         | 1.77             | 1.73             | 1.80             |
| H6...O2  |         | 1.78             | 1.73             | 1.80             |
| H4...O1  |         | 1.64             | 1.58             | 1.65             |
| H7...O4  |         | 1.88             | 1.86             | 1.88             |

**Table S3.** NBO charges for different metals in AL3 complexes at the level of M06-2X/6-311++G\*\*

| compound | Mg <sup>2+</sup> | Ca <sup>2+</sup> | Zn <sup>2+</sup> |
|----------|------------------|------------------|------------------|
| AL3      | 1.72             | 1.82             | 1.60             |
| AL3-an   | 1.70             | 1.76             | 1.56             |
| AL3-2an  | 1.65             | 1.71             | 1.52             |
| AL3-3an  | 1.63             | 1.69             | 1.49             |

**Table S4.** Dissociation energies ( $\Delta E$ ), enthalpies ( $\Delta H$ ) and free energies ( $\Delta G$ ) of the studied metal cation complexes at M06-2X/6-311++G\*\* level of theory in methanol solvent. All energies are BSSE-corrected in kcal/mol.

| compound | Mg <sup>2+</sup> |            |            | Ca <sup>2+</sup> |            |            | Zn <sup>2+</sup> |            |            |
|----------|------------------|------------|------------|------------------|------------|------------|------------------|------------|------------|
|          | $\Delta E$       | $\Delta H$ | $\Delta G$ | $\Delta E$       | $\Delta H$ | $\Delta G$ | $\Delta E$       | $\Delta H$ | $\Delta G$ |
| AL1      | 30.70            | 31.29      | 21.13      | 15.11            | 15.70      | 6.51       | 31.00            | 31.59      | 21.13      |
| AL1-an   | 53.96            | 54.55      | 44.42      | 28.24            | 28.83      | 19.75      | 57.77            | 58.36      | 48.03      |
| AL1-2an  | 94.93            | 95.52      | 85.19      | 58.11            | 58.70      | 49.18      | 103.20           | 103.79     | 93.36      |
| AL1-3an  | 122.16           | 122.76     | 111.62     | 54.57            | 55.16      | 44.76      | 142.49           | 143.08     | 132.01     |
| AL2      | 32.64            | 33.24      | 23.58      | 15.89            | 16.49      | 8.00       | 33.01            | 33.60      | 23.72      |
| AL2-an   | 54.15            | 54.75      | 45.17      | 28.36            | 28.95      | 19.68      | 58.20            | 58.79      | 49.02      |
| AL2-2an  | 102.73           | 103.32     | 94.81      | 68.28            | 68.87      | 60.92      | 109.95           | 110.54     | 101.89     |
| AL2-3an  | 147.30           | 147.89     | 138.28     | 91.06            | 91.65      | 82.09      | 157.16           | 157.75     | 147.86     |
| AL3      | 41.82            | 42.41      | 32.33      | 21.67            | 22.26      | 13.16      | 41.95            | 42.54      | 32.61      |
| AL3-an   | 54.73            | 55.32      | 45.92      | 29.00            | 29.59      | 20.54      | 56.77            | 57.37      | 47.77      |
| AL3-2an  | 91.62            | 92.22      | 84.13      | 59.56            | 60.16      | 52.10      | 96.55            | 97.14      | 88.40      |
| AL3-3an  | 131.14           | 131.73     | 123.42     | 93.08            | 93.67      | 85.56      | 138.04           | 138.63     | 130.44     |

**Table S5.** Electron densities, in e/a.u.<sup>3</sup>, Laplacian of the electron densities, in e/a.u.<sup>5</sup>, and different energy densities at BCP, in a.u., derived from AIM analysis at the level of M06-2X/6-311++G\*\*

| compound | Mg <sup>2+</sup> |           |        |         |         |                   | Ca <sup>2+</sup> |        |         |         |                   | Zn <sup>2+</sup> |        |         |         |                   |
|----------|------------------|-----------|--------|---------|---------|-------------------|------------------|--------|---------|---------|-------------------|------------------|--------|---------|---------|-------------------|
|          | BCP              | $\rho(r)$ | $G(r)$ | $V(r)$  | $H(r)$  | $\nabla^2\rho(r)$ | $\rho(r)$        | $G(r)$ | $V(r)$  | $H(r)$  | $\nabla^2\rho(r)$ | $\rho(r)$        | $G(r)$ | $V(r)$  | $H(r)$  | $\nabla^2\rho(r)$ |
| AL3      | M-O3             | 0.0534    | 0.0964 | -0.0822 | 0.0142  | 0.4424            | 0.0437           | 0.0549 | -0.0494 | 0.0055  | 0.2417            | 0.0894           | 0.1410 | -0.1497 | -0.0087 | 0.5296            |
|          | M-O2             | 0.0526    | 0.0943 | -0.0802 | 0.0141  | 0.4336            | 0.0424           | 0.0531 | -0.0475 | 0.0056  | 0.2346            | 0.0896           | 0.1411 | -0.1497 | -0.0085 | 0.5303            |
|          | M-O1             | 0.0553    | 0.1005 | -0.0863 | 0.0141  | 0.4584            | 0.0471           | 0.0596 | -0.0541 | 0.0054  | 0.2598            | 0.0854           | 0.1320 | -0.1408 | -0.0088 | 0.4931            |
|          | H3-O5            | 0.0565    | 0.0504 | -0.0610 | -0.0106 | 0.1593            | 0.0465           | 0.0433 | -0.0480 | -0.0048 | 0.1541            | 0.0602           | 0.0526 | -0.0656 | -0.0130 | 0.1586            |
|          | H2-O6            | 0.0546    | 0.0494 | -0.0586 | -0.0093 | 0.1603            | 0.0470           | 0.0439 | -0.0488 | -0.0049 | 0.1559            | 0.0583           | 0.0518 | -0.0634 | -0.0116 | 0.1610            |
|          | H1-O4            | 0.0668    | 0.0587 | -0.0757 | -0.0170 | 0.1670            | 0.0548           | 0.0503 | -0.0595 | -0.0092 | 0.1646            | 0.0675           | 0.0589 | -0.0764 | -0.0175 | 0.1656            |
|          | H4-O7            | 0.0357    | 0.0345 | -0.0347 | -0.0002 | 0.1375            | 0.0341           | 0.0330 | -0.0326 | 0.0004  | 0.1337            | 0.0357           | 0.0345 | -0.0346 | -0.0002 | 0.1372            |
| AL3-an   | M-O3             | 0.0497    | 0.0879 | -0.0741 | 0.0138  | 0.4070            | 0.0407           | 0.0511 | -0.0454 | 0.0057  | 0.2273            | 0.0785           | 0.1184 | -0.1256 | -0.0072 | 0.4448            |
|          | M-O2             | 0.0492    | 0.0872 | -0.0732 | 0.0140  | 0.4049            | 0.0402           | 0.0506 | -0.0447 | 0.0059  | 0.2259            | 0.0800           | 0.1232 | -0.1300 | -0.0068 | 0.4654            |
|          | M-O1             | 0.0715    | 0.1380 | -0.1252 | 0.0128  | 0.6036            | 0.0654           | 0.0828 | -0.0813 | 0.0016  | 0.3375            | 0.1132           | 0.1831 | -0.2021 | -0.0190 | 0.6564            |
|          | H3-O5            | 0.0438    | 0.0413 | -0.0447 | -0.0034 | 0.1514            | 0.0392           | 0.0375 | -0.0388 | -0.0013 | 0.1446            | 0.0426           | 0.0403 | -0.0431 | -0.0028 | 0.1499            |
|          | H2-O6            | 0.0417    | 0.0398 | -0.0422 | -0.0024 | 0.1498            | 0.0389           | 0.0374 | -0.0385 | -0.0011 | 0.1454            | 0.0421           | 0.0401 | -0.0427 | -0.0026 | 0.1503            |
|          | H4-O1            | 0.0336    | 0.0320 | -0.0319 | 0.0000  | 0.1281            | 0.0388           | 0.0365 | -0.0381 | -0.0017 | 0.1392            | 0.0305           | 0.0292 | -0.0283 | 0.0009  | 0.1203            |
|          | H7-O4            | 0.0234    | 0.0222 | -0.0201 | 0.0021  | 0.0975            | 0.0241           | 0.0230 | -0.0208 | 0.0021  | 0.1003            | 0.0230           | 0.0218 | -0.0197 | 0.0021  | 0.0957            |
| AL3-2an  | M-O3             | 0.0431    | 0.0735 | -0.0607 | 0.0127  | 0.3447            | 0.0358           | 0.0443 | -0.0386 | 0.0058  | 0.2005            | 0.0635           | 0.0896 | -0.0956 | -0.0061 | 0.3339            |
|          | M-O2             | 0.0685    | 0.1329 | -0.1187 | 0.0143  | 0.5889            | 0.0612           | 0.0809 | -0.0777 | 0.0032  | 0.3363            | 0.1123           | 0.1829 | -0.2001 | -0.0173 | 0.6624            |
|          | M-O1             | 0.0659    | 0.1232 | -0.1104 | 0.0128  | 0.5437            | 0.0597           | 0.0750 | -0.0725 | 0.0025  | 0.3101            | 0.1039           | 0.1644 | -0.1797 | -0.0153 | 0.5962            |
|          | H3-O5            | 0.0353    | 0.0341 | -0.0340 | 0.0001  | 0.1366            | 0.0332           | 0.0321 | -0.0313 | 0.0008  | 0.1314            | 0.0331           | 0.0320 | -0.0313 | 0.0008  | 0.1312            |

|         |       |        |        |         |         |        |        |        |         |         |        |        |        |         |         |        |
|---------|-------|--------|--------|---------|---------|--------|--------|--------|---------|---------|--------|--------|--------|---------|---------|--------|
| AL3-3an | H6-O2 | 0.0332 | 0.0308 | -0.0308 | 0.0000  | 0.1230 | 0.0379 | 0.0346 | -0.0361 | -0.0015 | 0.1325 | 0.0308 | 0.0288 | -0.0281 | 0.0007  | 0.1178 |
|         | H4-O1 | 0.0412 | 0.0384 | -0.0411 | -0.0027 | 0.1429 | 0.0476 | 0.0431 | -0.0489 | -0.0058 | 0.1493 | 0.0381 | 0.0359 | -0.0373 | -0.0014 | 0.1381 |
|         | H7-O4 | 0.0259 | 0.0248 | -0.0228 | 0.0020  | 0.1072 | 0.0267 | 0.0256 | -0.0237 | 0.0019  | 0.1101 | 0.0255 | 0.0244 | -0.0224 | 0.0020  | 0.1057 |
|         | M-O3  | 0.0616 | 0.1131 | -0.0999 | 0.0132  | 0.5051 | 0.0549 | 0.0696 | -0.0663 | 0.0032  | 0.2912 | 0.1001 | 0.1569 | -0.1701 | -0.0132 | 0.5747 |
|         | M-O2  | 0.0615 | 0.1139 | -0.1001 | 0.0138  | 0.5106 | 0.0557 | 0.0700 | -0.0667 | 0.0033  | 0.2931 | 0.1002 | 0.1568 | -0.1700 | -0.0132 | 0.5747 |
|         | M-O1  | 0.0601 | 0.1091 | -0.0963 | 0.0128  | 0.4876 | 0.0546 | 0.0712 | -0.0672 | 0.0040  | 0.3009 | 0.0885 | 0.1336 | -0.1447 | -0.0111 | 0.4898 |
|         | H5-O3 | 0.0391 | 0.0357 | -0.0378 | -0.0021 | 0.1347 | 0.0444 | 0.0396 | -0.0439 | -0.0044 | 0.1408 | 0.0365 | 0.0336 | -0.0347 | -0.0010 | 0.1305 |
| AL2     | H6-O2 | 0.0383 | 0.0348 | -0.0365 | -0.0018 | 0.1319 | 0.0439 | 0.0390 | -0.0432 | -0.0042 | 0.1391 | 0.0364 | 0.0335 | -0.0345 | -0.0010 | 0.1301 |
|         | H4-O1 | 0.0542 | 0.0476 | -0.0572 | -0.0096 | 0.1524 | 0.0635 | 0.0537 | -0.0691 | -0.0154 | 0.1531 | 0.0526 | 0.0464 | -0.0550 | -0.0086 | 0.1511 |
|         | H7-O4 | 0.0287 | 0.0274 | -0.0259 | 0.0015  | 0.1158 | 0.0299 | 0.0286 | -0.0273 | 0.0013  | 0.1195 | 0.0287 | 0.0274 | -0.0259 | 0.0015  | 0.1158 |
|         | M-O3  | 0.0514 | 0.0916 | -0.0775 | 0.0140  | 0.4224 | 0.0413 | 0.0515 | -0.0459 | 0.0056  | 0.2286 | 0.0875 | 0.1369 | -0.1450 | -0.0080 | 0.5157 |
|         | M-O2  | 0.0505 | 0.0892 | -0.0755 | 0.0138  | 0.4122 | 0.0398 | 0.0489 | -0.0434 | 0.0055  | 0.2174 | 0.0871 | 0.1356 | -0.1435 | -0.0079 | 0.5107 |
|         | M-O1  | 0.0526 | 0.0946 | -0.0805 | 0.0142  | 0.4351 | 0.0445 | 0.0563 | -0.0505 | 0.0058  | 0.2484 | 0.0813 | 0.1237 | -0.1315 | -0.0078 | 0.4636 |

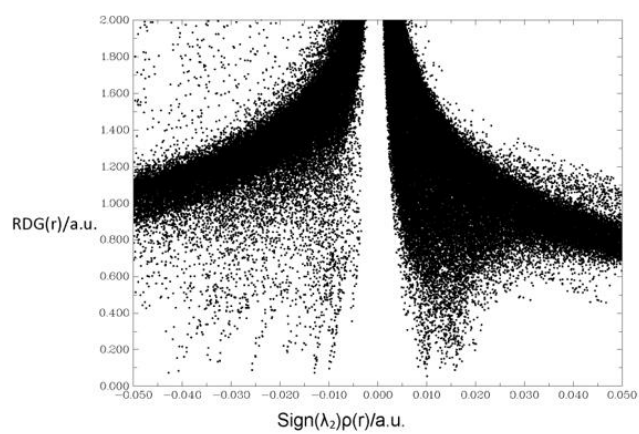

$\text{Mg}^{2+}\text{-AL3-2an}$

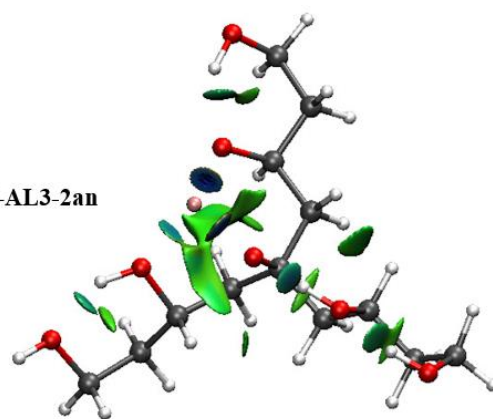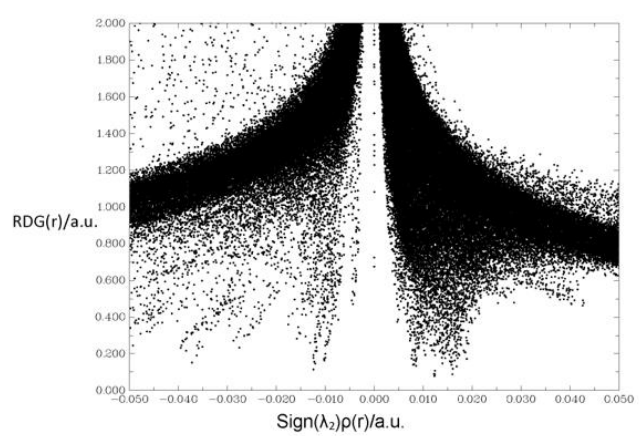

$\text{Mg}^{2+}\text{-AL3-3an}$

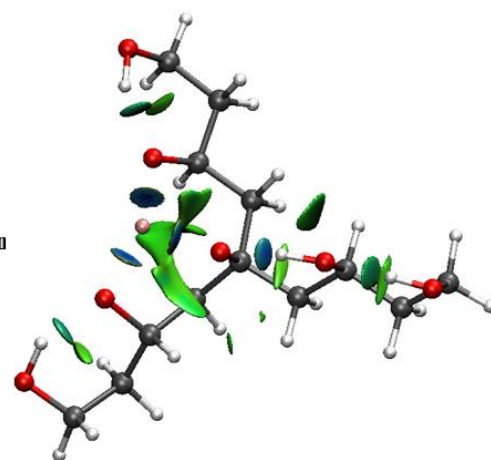

**Fig. S1.** The scatter diagrams (left) and color-filled RDG isosurface maps (right) at the M06-2X/6-311++G\*\* level of theory
